# Supplementary material for: Indocyanine green within glycosylated polymeric micelles as potential image agents to map sentinel lymph nodes and breast cancer
Source: Royal Society of Chemistry journal article supplement (doi:10.1039/d3pm00053b), 2024-01-01
Supplement: d3pm00053b1.pdf [file d3pm00053b1.pdf]

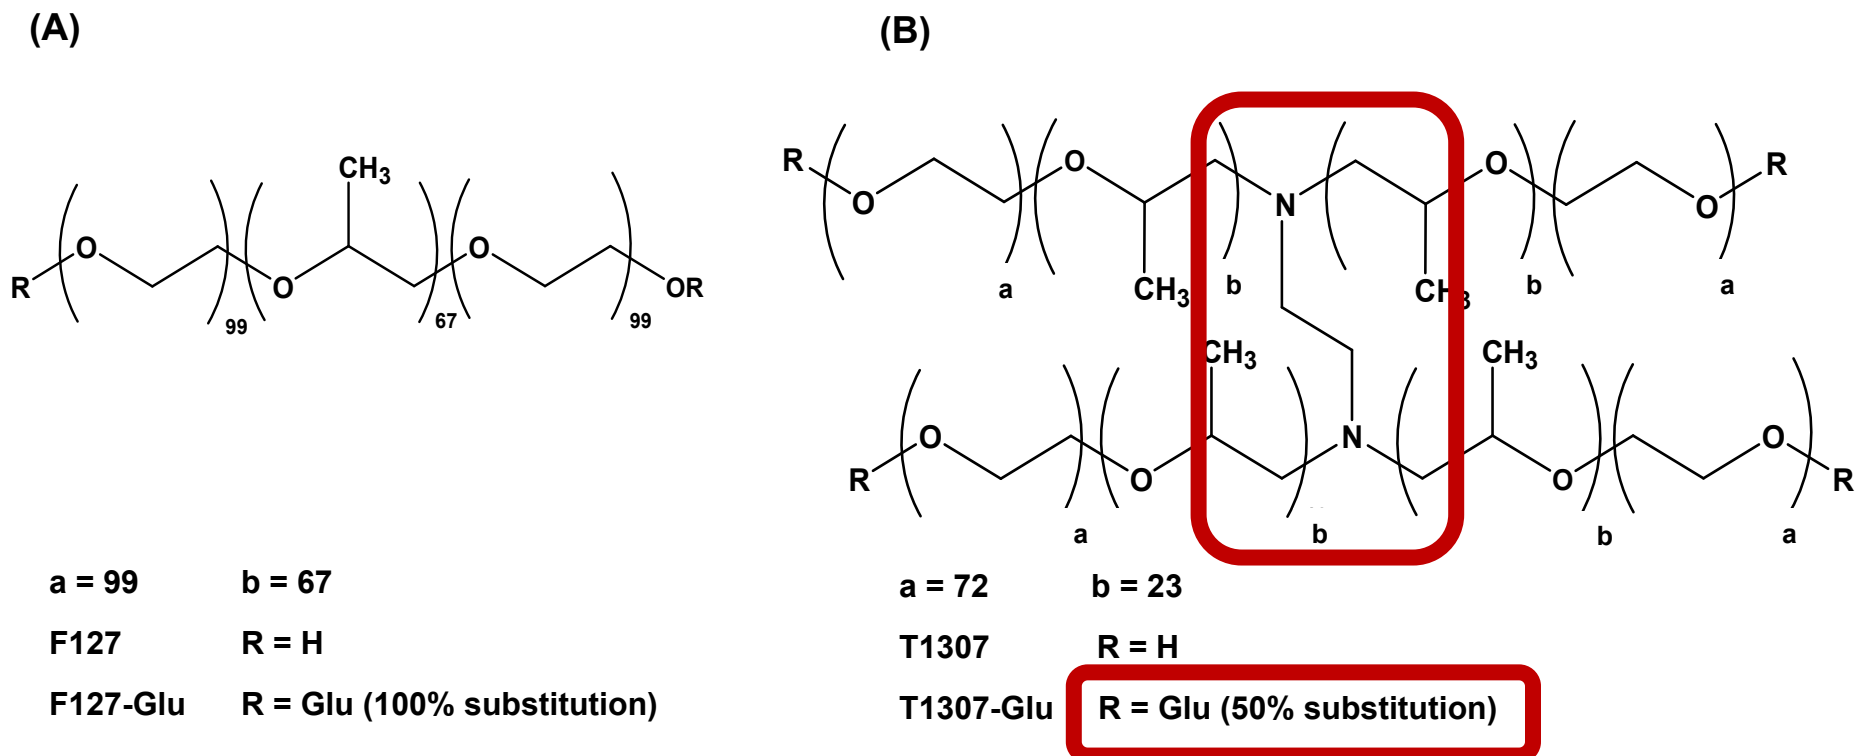

**Figure S1.** Chemical formula of pristine and glucosylated copolymers proposed in this work: **(A)** lineal poloxamer F127 and F127-Glu and **(B)** branched poloxamine T1307 and T1307-Glu, respectively.

Differences between F127 and T1307 copolymers: molecular weight, number of branched arms and ethylenediamine central core. Differences in the lactone-incorporation processes: number of incorporated-Glu during the conjugation (% substitution).

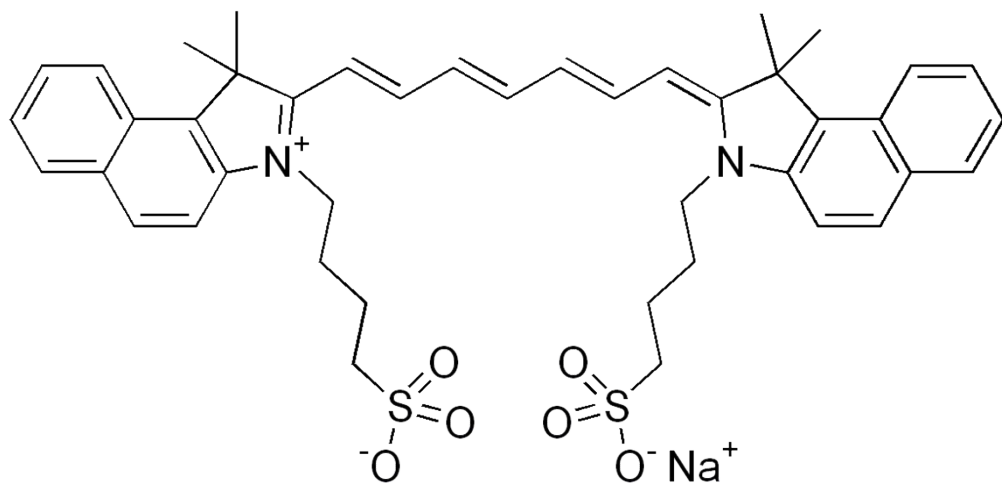

**Figure S2.** Chemical structure of Indocyanine Green (ICG), a FDA-approved poor water-soluble NIR fluorescent dye used in the present work.

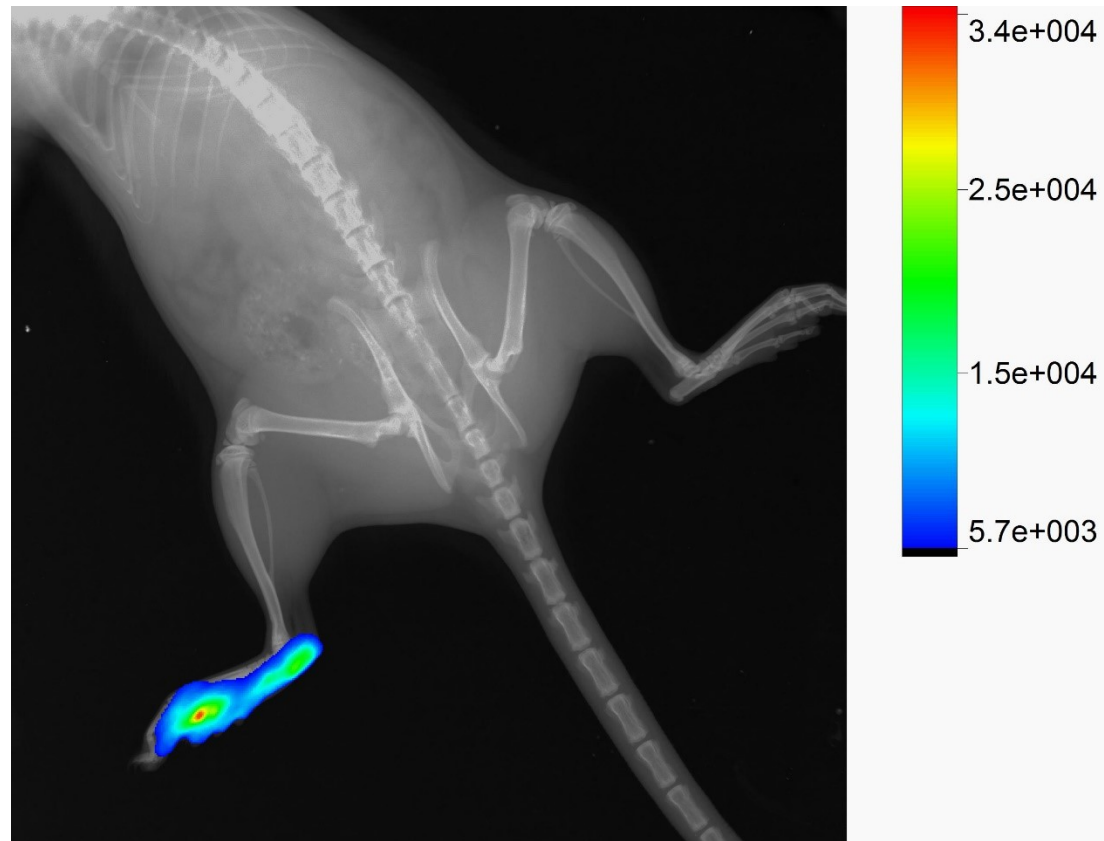

**Figure S3.** Representative *in vivo* image of free-ICG uptake after ID injection (dose 37.5  $\mu$ g) on Wistar healthy rats by FX-MX-Pro camera fluorescence (in arbitrary units) 120 min post-injection.
